# Supplementary material
Source: PubMed Central journal article supplement (PMC3505382)
Supplement: mmi7430-0063-SD1.pdf [file mmi7430-0063-SD1.pdf]

**Table S1. Growth characteristics of *Rhodopseudomonas palustris* TIE-1 WT and  $\Delta fixK$  during aerobic and anaerobic growth<sup>a</sup>.**

| Generation time (h)             |            |            |            |            |            |            |                   |            |          |            |
|---------------------------------|------------|------------|------------|------------|------------|------------|-------------------|------------|----------|------------|
| Strain                          | Succinate  |            | Acetate    |            | Benzoate   |            | 4-Hydroxybenzoate |            | Hydrogen |            |
|                                 | Aerobic    | Anaerobic  | Aerobic    | Anaerobic  | Aerobic    | Anaerobic  | Aerobic           | Anaerobic  | Aerobic  | Anaerobic  |
| <b>WT</b>                       | 3.8 ± 0.5  | 3.7 ± 0.2  | 4.7 ± 1.2  | 1.8 ± 0.1  | 4.8 ± 0.1  | 4.0 ± 0.6  | 4.9 ± 0.6         | 2.8 ± 0.1  | ND       | 2.7 ± 0.3  |
| <b><math>\Delta fixK</math></b> | 6.1 ± 0.9  | 9.4 ± 0.1  | 3.0 ± 0.1  | 8.0 ± 0.3  | 8.2 ± 1.3  | 7.4 ± 0.5  | 5.7 ± 1.1         | 6.9 ± 0.5  | ND       | 7.9 ± 0.4  |
| Lag time (h)                    |            |            |            |            |            |            |                   |            |          |            |
| <b>WT</b>                       | 15.6 ± 2.2 | 20.9 ± 1.4 | 16.6 ± 1.7 | 8.3 ± 0.1  | 19.6 ± 0.2 | 20.1 ± 3.1 | 12.1 ± 3.2        | 18.4 ± 0.8 | ND       | 17.6 ± 1.8 |
| <b><math>\Delta fixK</math></b> | 16.3 ± 1.3 | 52.9 ± 0.8 | 19.3 ± 0.2 | 36.9 ± 1.5 | 19.6 ± 0.8 | 49.0 ± 3.6 | 13.6 ± 2.0        | 45.6 ± 3.5 | ND       | 52.6 ± 2.3 |

**a.** Growth was measured as indicated in *Experimental procedures*; lag time represents the time required to reach 0.1 OD<sub>660</sub>. Values represent the average and standard deviation of triplicate measurements. ND – Not determined, as aerobic growth could not be performed with hydrogen.

**Table S2. Strains and plasmids used in the study.**

| Strain                                 | Genotype and Use                                                                                                                                                               | Reference                         |
|----------------------------------------|--------------------------------------------------------------------------------------------------------------------------------------------------------------------------------|-----------------------------------|
| <i>E. coli</i> DH10B                   | F <sup>-</sup> <i>endA1 recA1 galE15 galK16 nupG rpsL ΔlacX74 Φ80lacZΔM15 araD139 Δ(ara,leu)7697 mcrA Δ(mrr-hsdRMS-mcrBC) λ<sup>-</sup></i> . Used as standard cloning strain. | (Casadaban & Cohen, 1980)         |
| <i>E. coli</i> S17-1/λpir              | λpir lysogen of strain S17-1 [ <i>thi pro hdsR hdsM<sup>+</sup> recA</i> ; chromosomal insertion of RP4-2 (Tc::Mu Km::Tn7)]. Used as a conjugative donor strain.               | (de Lorenzo <i>et al.</i> , 1993) |
| <i>R. palustris</i> TIE-1              | Isolated as a phototrophic iron oxidizer from Woods Hole, MA. Served as WT strain.                                                                                             | (Jiao <i>et al.</i> , 2005)       |
| AB8                                    | <i>R. palustris</i> TIE-1 with a <i>Ppio-lacZ</i> fusion inserted at the <i>glmUSX-recG</i> locus.                                                                             | This study                        |
| AB10                                   | Δ <i>fixK</i> derivative of AB8                                                                                                                                                | This study                        |
| AB15                                   | AB10 complemented with WT <i>fixK</i> cloned into pSRKGm                                                                                                                       | This study                        |
| AB20                                   | AB10 complemented with WT NtermHis <sub>6</sub> - <i>fixK</i> cloned into pSRKGm                                                                                               | This study                        |
| Plasmid                                | Description and/or Construction                                                                                                                                                | Reference                         |
| pBBR1MCS-5                             | Broad host range mobilizable plasmid; Gm <sup>r</sup> , lacZalpha, 4.8 kb                                                                                                      | (Kovach <i>et al.</i> , 1995)     |
| pJQ200KS                               | Mobilizable suicide vector; <i>sacB</i> , Gm <sup>r</sup>                                                                                                                      | (Quandt & Hynes, 1993)            |
| pSRKGm                                 | Complementation plasmid modified from pBBR1MCS-5; Gm <sup>r</sup>                                                                                                              | (Khan <i>et al.</i> , 2008)       |
| pCR <sup>®</sup> 2.1-TOPO <sup>®</sup> | Commercial 3.9 kb TOPO-TA cloning vector; Km <sup>r</sup> , Ap <sup>r</sup> , lacZalpha                                                                                        | Invitrogen, Carlsbad, CA          |
| pET-11a                                | Commercial <i>E. coli</i> overexpression plasmid; Ap <sup>r</sup>                                                                                                              | Novagen, Gibbstown, NJ            |
| pUC18-mini-Tn7-Gm- <i>lacZ</i>         | Source of <i>lacZ</i> gene; Gm <sup>r</sup>                                                                                                                                    | (Choi & Schweizer, 2006)          |

|        |                                                                                                                                                                                                                                                                                                                                                                                                                                                                                                                                                                                    |            |
|--------|------------------------------------------------------------------------------------------------------------------------------------------------------------------------------------------------------------------------------------------------------------------------------------------------------------------------------------------------------------------------------------------------------------------------------------------------------------------------------------------------------------------------------------------------------------------------------------|------------|
| pAB300 | Fusion PCR was used to remove an internal <i>NdeI</i> site in the <i>lacZ</i> gene from pUC18-mini-Tn7-Gm- <i>lacZ</i> using primers lacZfor and lacZNdeI-rev for PCR1; lacZrev and lacZNdeI-for were used for PCR2. <i>R. palustris</i> TIE-1 genomic DNA was used as template. PCR3 was performed using lacZfor and lacZrev with PCR1 and PCR2 as templates. This resulted in a <i>lacZ</i> gene without an internal <i>NdeI</i> site that was then cloned into <i>NcoI-EcoRI</i> digested pBBR1MCS-5. This <i>lacZ</i> gene however had a Phe to Leu mutation at position 1008. | This study |
| pAB301 | Fusion PCR was used to revert the Phe to Leu mutation at position 1008 of the <i>lacZ</i> gene in pAB300 using primers lacZmp(F)for and lacZrev for PCR1; lacZmp(F)rev and lacZfor were used for PCR2. pAB300 was used as template. PCR3 was performed using lacZfor and lacZrev with PCR1 and PCR2 as templates. This PCR was then cloned into the <i>NcoI-EcoRI</i> digested pAB300.                                                                                                                                                                                             | This study |
| pAB307 | The promoter region of <i>pioABC</i> operon of <i>Rhodopseudomonas palustris</i> TIE-1 was amplified using primers PpioTIE1for and PpioTIE1rev and cloned into <i>AscI-NdeI</i> digested pAB301.                                                                                                                                                                                                                                                                                                                                                                                   | This study |
| pAB314 | Fusion PCR was used to amplify the 2 kb region surrounding the <i>glmUSX-recG</i> locus of <i>R. palustris</i> TIE-1 cloned into pJQ200KS. PCR1 was performed using TIE-1upfor and TIE-1fusionrev(new); PCR2 was performed using TIE-1dnrev and TIE-1fusionfor(new). <i>R. palustris</i> TIE-1 genomic DNA was used as template. PCR3 was performed using TIE-1upfor and TIE-1dnrev with PCR1 and PCR2 as templates. This PCR product has an internal <i>NcoI</i> site was then cloned into <i>SphI-SmaI</i> digested pJQ200KS.                                                    | This study |
| pAB322 | The Ppio <sup>TIE-1</sup> - <i>lacZ</i> translational fusion was amplified from pAB307 using primers lacZforpartial( <i>NcoI</i> ) and lacZrev( <i>NcoI</i> ) and cloned into <i>NcoI</i> digested pAB314.                                                                                                                                                                                                                                                                                                                                                                         | This study |
| pAB343 | The putative first FixK binding site (BS1) was deleted using fusion PCR. PCR1 was performed using PpioTIE1for and PpioTIE1-FixK2BSrev. PCR2 was performed using PpioTIE1rev and PpioTIE1-FixK2BSfor. <i>R. palustris</i> TIE-1 genomic DNA was used as template. PCR3 was performed using PpioTIE1for and PpioTIE1rev with PCR1 and PCR2 as templates. This product was cloned into <i>AscI-NdeI</i> digested pAB322.                                                                                                                                                              | This study |

|        |                                                                                                                                                                                                                                                                                                                                                                                                                                                                                                                           |            |
|--------|---------------------------------------------------------------------------------------------------------------------------------------------------------------------------------------------------------------------------------------------------------------------------------------------------------------------------------------------------------------------------------------------------------------------------------------------------------------------------------------------------------------------------|------------|
| pAB404 | The putative second FixK binding site (BS2) was deleted using fusion PCR. PCR1 was performed using PpioTIE1for and FixK2-BS2rev. PCR2 was performed using PpioTIErev and FixK2-BS2for. <i>R. palustris</i> TIE-1 genomic DNA was used as template. PCR3 was performed using PpioTIE1for and PpioTIE1rev with PCR1 and PCR2 as templates. This product was cloned into <i>AscI-NdeI</i> digested pAB322.                                                                                                                   | This study |
| pAB337 | Fusion PCR was used to fuse the 1 kb upstream and 1 kb downstream region of Rpal_4729 gene of <i>R. palustris</i> TIE-1 (FixK). PCR1 was performed using primers DRpal_4729for and DRpal_4729fusrev(new). PCR2 was performed using primers DRpal_4729rev2 and DRpal_4729fusfor(new). <i>R. palustris</i> TIE-1 genomic DNA was used as template. PCR3 was performed using primers DRpal_4729for and DRpal_4729rev2 with PCR1 and PCR2 as templates. This product was then cloned into <i>SpeI-NotI</i> digested pJQ200KS. | This study |
| pAB363 | For complementation of $\Delta fixK$ (AB10) with native <i>fixK</i> , Rpal_4729 was amplified using FixK2pSRKGmfor(NdeI) and FixK2(SpeI)rev with <i>R. palustris</i> TIE-1 genomic DNA as template. This PCR product was cloned into <i>NdeI-SpeI</i> digested pSRKGm.                                                                                                                                                                                                                                                    | This study |
| pAB368 | For affinity purification using Ni-NTA affinity chromatography an N-terminal 6X-Histidine tagged version of <i>fixK</i> from <i>R. palustris</i> TIE-1 was amplified using primers and FixK2TIE1NtermHisfor(NdeI) and FixK2rev(BamHI) with <i>R. palustris</i> TIE-1 genomic DNA as template. This PCR product was then cloned into <i>NdeI-BamHI</i> digested pET-11a.                                                                                                                                                   | This study |
| pAB408 | N-terminal 6X-Histidine tagged version of <i>fixK</i> from <i>R. palustris</i> TIE-1 was reamplified from pAB368 using primers FixK2TIE1NtermHisfor(NdeI) and FixK2(SpeI)rev. This PCR product was then cloned into the <i>NdeI-SpeI</i> digested pSRKGm.                                                                                                                                                                                                                                                                 | This study |

**Table S3. Primers used in the study for plasmid construction.**

| <b>Primer</b>        | <b>Sequence</b>                                                                                           |
|----------------------|-----------------------------------------------------------------------------------------------------------|
| lacZfor              | CTCGAGCCATGGTAAACCGATAACAATTAAAGGCTCCTTTTGGAGCCTTTTTTTTTGGAGGGCGCGCCAAGCTTCATATGACCAT<br>GATTACGGATTCACTG |
| lacZNdel-rev         | CGCCACCAATCCCCATGTGGAAACCGTCGATATTC                                                                       |
| lacZrev(SpeI)        | GGCGCGCCACTAGTAAAAAACCCCTCAAGACCCGTTTAGAGGCCCAAGGGTTATTATTTTTGACACCAGACCAACTG                             |
| lacZNdel-for         | GAATATCGACGGTTTCCACATGGGGATTGGTGGCG                                                                       |
| lacZmp(F)for         | GTCAGTATCGGCGGAGTTCCAGCTGAGCG                                                                             |
| lacZmp(F)rev         | CGCTCAGCTGGAACTCCGCCGATACTGAC                                                                             |
| PpioTIE1for          | GGCGCGCCAAGCTTGATTGCGAGTCGTCCTGTTGCACAACG                                                                 |
| PpioTIE1rev          | GGCGGCCCCATATGGTCCCCCGCAAGTGCTCAAAGC                                                                      |
| TIE-1upfor           | GGCGCGCCGCATGCCACACCGGCAGGTTGTTGATGGCTG                                                                   |
| TIE-1fusionrev(new)  | CGGGTTAGTTACCACGCGTCATTACTAGTTCGCGACCATGGCTACCCGACCTTGTCGGGCGCCTTTTC                                      |
| TIE-1dnrev           | ACTAGTCCCGGGCGAGATCGATTTTCTGGTCGGCAC                                                                      |
| TIE-1fusionfor(new)  | GAAAAGGCGCCGGACAAGGTCGGGTAGCCATGGTCGCGAACTAGTAATGACGCGTGGTAACTAACCCG                                      |
| lacZforpartial(NcoI) | CTCGAGCCATGGTAAACCGATAACAATTAAAGGCTC                                                                      |
| lacZrev(NcoI)        | GGCGGCCCCATGGAAAAAACCCCTCAAGACCCGTTTAGAG                                                                  |
| PpioTIE-1-FixK2BSrev | GTGGTCGACTAACTCTTGATTGCCCTGTGCGCAATGCAGC                                                                  |

|                            |                                                                                                 |
|----------------------------|-------------------------------------------------------------------------------------------------|
| PpioTIE-1-FixK2BSfor       | GCTGCATTGCGCACAGGGCAATCAAGAGTTAGTCGACCAC                                                        |
| FixK2-BS2rev               | TCTGCTGCGTATGCTAACAGATGTGAATAAATACGCGTTTTAGTACGTTGTGTGAC                                        |
| FixK2-BS2for               | GTCACACAACGTACTAAAACGCGTATTTATTACATCTGTTAGCATAACGCAGCAGA                                        |
| DRpal_4729for              | GGCGCGCCACTAGTTCGGACTTCATCGAGAAGCCATTCG                                                         |
| DRpal_4729fusrev(new)      | CGATCCGATGAAAAGAGATGCTCTCTAGATTACTGGCCATCTCCTTTGATC                                             |
| DRpal_4729rev2             | ACTAGTGCGGCCGCGATACTTGGTGCGCCGAATACACCACGATC                                                    |
| DRpal_4729fusfor(new)      | GATCAAAGGAGATGGCCAGTAATCTAGAGAGCATCTCTTTCATCGGATCG                                              |
| FixK2pSRKGmfor(Ndel)       | GGCGCGCCCATATGCTGAACCAGTCGCTCAGGACG                                                             |
| FixK2(Spel)rev             | GGCGCGCCACTAGTTTTAGGCGTCGAGATTGCGAAGC                                                           |
| FixK2TIE1NtermHisfor(Ndel) | GGCGCGCCCATATGGGCAGCAGCCATCATCATCATCACAGCAGCGGCCTGGTGCCGCGCGGCAGCCACATGCTGAACCAGT<br>CGCTCAGGAC |
| FixK2rev(BamHI)            | ACTAGTGGATCCTTAGGCGTCGAGATTGCGAAGCTG                                                            |
| delFixK2upchkfor           | GACACCGGCAGCGGTCTGC                                                                             |
| delFixK2upchkrev           | CAGAAGAGGCCACCATTGCTG                                                                           |
| delFixK2dnchkfor           | GATATGGAGCGAAATACCTCG                                                                           |
| delFixK2dnchkrev           | GCGAGGATGTCGTCGATG                                                                              |

**Table S4. Primers used in the study for RACE.**

| <b>Primer</b>     | <b>Purpose</b>    | <b>Sequence</b>                       |
|-------------------|-------------------|---------------------------------------|
| pioARACErev1      | 5'RLM-RACE        | ACCAGCGCATTGACCGAC                    |
| pioARACErev2      | 5'RLM-RACE, cRACE | CAGCGACGAGATCCAGCTC                   |
| PpioTIE1rev       | 5'RLM-RACE        | GGCGCGCCCATATGGTCCCCCGCAAGTGCTCAAAGC  |
| 5'RACEouter       | 5'RLM- RACE       | GCTGATGGCGATGAATGAACACTG              |
| WNp213            | cRACE             | GTCTCGTTAGCTCGCTGGATCCTA 3'Inverted T |
| WNp210            | cRACE             | TAGGATCCAGCGAGCTAACGAGAC              |
| M13 Forward (-20) | Sequencing        | GTAAAACGACGGCCAG                      |
| M13 Reverse       | Sequencing        | CAGGAAACAGCTATGAC                     |

**Table S5. Primers used in the study for qRT-PCR.**

| <b>Primer name</b> | <b>Sequence</b>        |
|--------------------|------------------------|
| Rpal_4713for       | CTTCCTGGTTCGGTTGGC     |
| Rpal_4713rev       | AGGCTGACGGTTTTAGTGAC   |
| Rpal_3436for       | ACATCTTCGGCGTGCTG      |
| Rpal_3436rev       | GTACTTCACCGTCACCAGC    |
| Rpal_4015for       | GGCAGGACCAAATCGCAG     |
| Rpal_4015rev       | GTTGATCGAGCAGTTGATTGG  |
| Rpal_2453or        | GATGACATCACGCCGAG      |
| Rpal_2453rev       | AACCCGAGCACGTTGAC      |
| Rpal_1413for       | CATCGTCGGCATCGTCAG     |
| Rpal_1413rev       | ATCAGCTCCAGTGTGATTGAG  |
| Rpal_0922for       | ACATCACAGGCAAGAACGAAG  |
| Rpal_0922rev       | TGGTGAAGATGAAGCCCG     |
| Rpal_0020for       | GCATCGTCCTCTACATCTCG   |
| Rpal_0020rev       | ACGCCACATCAGACCTTG     |
| Rpal_4994for       | TGACCAAGTTTCTGACCGC    |
| Rpal_4994rev       | ACACGAGGTTGAATGCCG     |
| Rpal_4717for       | CTGACCTCGTTGACTTACCAG  |
| Rpal_4717rev       | CAGCACCATGATCGGGATC    |
| Rpal_1280for       | GCAGCTTCGTGTTCAACG     |
| Rpal_1280rev       | CGCGACGTTTTGGATCAC     |
| Rpal_1868for       | TTCGATCCGAGCTTCAACAG   |
| Rpal_1868rev       | GGATCACTCTGTTCGGTTTTCG |
| Rpal_1869for       | TCCACCGGCTGACCTATC     |
| Rpal_1869rev       | GTGCCCTCTTCTTGTAGC     |
| Rpal_2582for       | CCGCAAACGATCACACTTATG  |
| Rpal_2582rev       | GATGCCGCAACCGAATC      |
| Rpal_2583for       | ACACCCTCAATCACTTCGC    |
| Rpal_2583rev       | AATAGGTCTTGCTGCCATCG   |
| Rpal_1206for       | TGCATTGGATTCCGATCGTC   |
| Rpal_1206rev       | GCGACCAGGAACGAGAC      |
| Rpal_1207for       | CGACGCTCACCTTCTTGAAG   |
| Rpal_1207rev       | ACATAGAGCTTCTTGGCGC    |
| Rpal_1691for       | GCTGGGTTTTGTTCCGATTG   |
| Rpal_1691rev       | GGATGTGTTTCTTGGCGGATTC |
| Rpal_1692for       | ATCGATAATCACCAGTCGCG   |
| Rpal_1692rev       | CCGTTGAGCACCCACAG      |
| Rpal_1412for       | GGTCCACTGCTGATACTCATG  |
| Rpal_1412rev       | GTCGAAGGTGAGATACGCTG   |
| Rpal_4729for       | GCCTCGGAATTCACCTACAAG  |
| Rpal_4729rev       | GATAGACGTATTCGGACGGC   |
| Rpal_2130for       | GAATTTCGAGCGTGCGGT     |
| Rpal_2130rev       | GAGGCCGAGGAAGTAGC      |
| pioAqRTPCRfor      | AAATTTTCGACGACACCATCGA |
| pioAqRTPCRrev      | CTTGCCGCGGAGGATCT      |
| pioBqRTPCRfor      | TCGCGCCAGGGTTCTATG     |
| pioBqRTPCRrev      | TTCCAGTAGGTGCCGTCCTT   |
| pioCqRTPCRfor      | ACGCCCAGGTCACCAAGA     |
| pioCqRTPCRrev      | GTTGGGCGACTCCTGATAGC   |



**Table S6. Primers used in the study for PCR to generate DNA substrates for EMSA.**

| <b>Primer name</b> | <b>Sequence</b>         |
|--------------------|-------------------------|
| FixK2BS1for        | CCGCAGAGCGCCTCCATCCAG   |
| FixK2BS1rev        | GCAGAACTAACAGGTCTGCGGTG |
| FixK2BS2for        | CACCGCAGACCTGTTAGTTCTGC |
| FixK2BS2rev        | CCTGCATCGCGACGCTTGC     |

1 **Detailed description of putative FixK upregulated during anaerobic growth.**

2 The putative FixK targets that were upregulated during anaerobic growth  
3 included genes involved in gene regulation, photosynthesis, respiration and  
4 transport-related functions. The regulatory proteins are AadR (Rpal\_4713), a  
5 CRP/FNR family regulator that has been shown to be important for anaerobic  
6 degradation of benzoate and 4-hydroxybenzoate in *R. palustris* CGA009  
7 (Dispensa *et al.*, 1992); predicted CRP/FNR family gene (Rpal\_1280), an *Irr*  
8 homolog (Rpal\_2583) and a PadR family protein (Rpal\_1207). Proteins  
9 belonging to the PadR family are repressors of the *padA* gene that encodes a  
10 detoxifying decarboxylase of phenolic acids such as p-coumarate (Barthelmebs  
11 *et al.*, 2000, Gury *et al.*, 2004). Interestingly, such compounds can be utilized by  
12 *R. palustris* CGA009 and likely by *R. palustris* TIE-1 (Pan *et al.*, 2008). The  
13 following genes important for photosynthesis were upregulated during  
14 photosynthetic growth: *hemO* (Rpal\_0922), *bchD* (Rpal\_1692) and *cycH*. HemO  
15 is predicted to be 5-aminolevulinate synthase, an important early enzyme in the  
16 porphyrin and bacteriochlorophyll biosynthetic pathway (Evans *et al.*, 2008).  
17 BchD is a protein important in porphyrin biosynthesis that precedes  
18 bacteriochlorophyll biosynthesis (Willows & Kriegel, 2008). CycH is important in  
19 cytochrome C biogenesis, thus playing a key role in both photosynthesis and  
20 respiration (Lang *et al.*, 1996). Genes involved in respiration that were induced  
21 include: *ccoN(OQP)*, encoding the *ccb3* cytochrome C terminal oxidase with high  
22 affinity for O<sub>2</sub> (Pitcher *et al.*, 2002), a small hypothetical gene near *ccoG*, and a  
23 cytochrome C accessory protein (Preisig *et al.*, 1996). The upregulated genes

1 encoding transport related proteins were: *ompW*, an outer membrane porin  
2 homolog (Rpal\_4994)(Lou *et al.*, 2009); *osmY*, a putative periplasmic osmotic  
3 shock gene (Rpal\_1868)(Yim & Villarejo, 1992); and a predicted ORF in an  
4 operon with a heavy metal transporter (Rpal\_2582)(Sitthisak *et al.*, 2007). In  
5 addition, a small predicted ORF encoding a protein likely involved in siderophore  
6 biosynthesis (Rpal\_4015) and Rpal\_1412, a signal peptide containing ORF with  
7 transmembrane domains were also highly upregulated under anoxic  
8 photosynthetic conditions. Overall these data show that *R. palustris* TIE-1  
9 responds dramatically to a shift from aerobic chemoheterotrophic to anoxic  
10 phototrophic growth changing expression of a number of potential FixK target  
11 genes.

1 **Detailed experimental procedures.**

2 **Construction of a single integration system for *R. palustris* TIE-1.** The  
3 intergenic region of the operon Rpal\_2933-2935 (*glmUS* homolog followed by a  
4 ORF of unknown function called gene *glmX* here) and Rpal\_2936 (*recG*  
5 homolog) was chosen as a permissive locus based on the usage of this locus as  
6 the insertion site for the Mini-Tn7 transposon in diverse bacteria (Koch *et al.*,  
7 2001). As *R. palustris* TIE-1 does not harbor this commonly found Tn7 insertion  
8 site, we devised a homologous recombination based single integration system  
9 that was based on the pJQ200KS counter-selection plasmid used for  
10 construction of mutants in *R. palustris* TIE-1 (Jiao & Newman, 2007). A 2 kb  
11 region surrounding the *glmUSX-recG* intergenic region was cloned into  
12 pJQ200KS giving rise to pAB314. A unique *NcoI* site was incorporated in the  
13 middle of this 2kb region such that the DNA to be incorporated could be cloned  
14 into pAB314. This system was later adapted to integrate *lacZ* translational  
15 fusions into the chromosome of *R. palustris* TIE-1 as described below. The  
16 pAB314-derived plasmids can be integrated on the *R. palustris* TIE-1  
17 chromosome using selection on gentamicin to form a merodiploid.  
18 Counterselection using sucrose results in segregation of the merodiploid to give  
19 rise to either strains that have the *lacZ* fusion on the chromosome or WT *R.*  
20 *palustris* TIE-1. PCR screening was performed to confirm the correct strain was  
21 constructed.

22

23

1 **Construction of a *lacZ* reporter system for *R. palustris* TIE-1.** The *lacZ* gene  
2 that encodes  $\beta$ -galactosidase of *E. coli* was amplified from pUC18-mini-Tn7-Gm-  
3 *lacZ*, engineering the fd terminator in front and the T7 terminator at the end of the  
4 gene. This PCR product was cloned into the *NcoI* and *EcoRI* sites of pBBR1-  
5 MCS5 such that an *NdeI* site was engineered to overlap with the ATG of *lacZ*. In  
6 front of this *NdeI* site, the restriction site for a rare 8 bp cutter *Ascl* was  
7 engineered resulting in pAB301 (Figure S6). The inherent Plac promoter in  
8 pBBR1-MCS5 was deleted during this construction resulting in a promoter-less  
9 *lacZ* plasmid. *Ascl-NdeI* sites can be used for cloning a desired promoter region  
10 and will result in the formation of a translational fusion. As the pBBR1 plasmid  
11 and its derivatives are broad host range plasmids, pAB301 can be used as a  
12 plasmid of general use. The *lacZ* system was designed as a cassette system so  
13 that it can be easily sub-cloned into other pBBR1 derivatives in case other  
14 selectable markers are desired.

15 **Determination of transcription start sites. 5'RLM-RACE.** Total RNA was  
16 isolated as described in the *Experimental procedures*. Reverse transcription (RT)  
17 was performed using SuperScript III RNase H- reverse transcriptase (Invitrogen,  
18 Carlsbad, CA), according to the manufacturer's protocol using gene specific  
19 primers (Table S4). PCR amplification of the cDNA from the RT reaction was  
20 performed with Taq DNA polymerase (New England Biolabs, Ipswich, MA) as  
21 recommended. The PCR reactions were run on a 2% agarose gel stained with 5  
22  $\mu\text{g/ml}$  of ethidium bromide. Relevant bands were cut out and DNA from the  
23 bands was purified using the Wizard<sup>®</sup> SV Gel and PCR Clean-Up System

1 (Promega, Madison, WI). The bands that were specific to the TAP plus reaction  
2 represented the transcription start site and the bands common to the TAP plus  
3 and minus reactions represented processed sites. The PCR products were  
4 reamplified using a nested primer using Taq DNA polymerase as recommended  
5 (New England Biolabs, Ipswich, MA). The primers used for amplification are  
6 listed in Table S4. The products were then cloned into pCR<sup>®</sup>2.1-TOPO<sup>®</sup> using  
7 the TOPO-TA cloning kit as per the manufacturer's guidelines (Invitrogen,  
8 Carlsbad, CA). The PCR products were sequenced at the Biopolymers  
9 Laboratory in the Massachusetts Institute of Technology Center for Cancer  
10 Research.

11 **cRACE.** Total RNA was isolated as described in the *Experimental procedures*  
12 and contaminating chromosomal DNA was digested with TURBO DNA-free  
13 (Ambion, Austin, TX). Reverse transcription was performed using the Superscript  
14 II RNase H- reverse transcriptase (Invitrogen, Carlsbad, CA) as follows: 5 µg of  
15 the resulting RNA was combined with 20 pmols of the gene specific primer and  
16 0.5 mM dNTPs. The resulting mixture was heated to 70°C for 10 min and  
17 immediately frozen on ice for at least 1 min. The first strand synthesis buffer, 10  
18 mM DTT, 4 U/µl Rnasin (Promega, Madison, WI) were added to the above  
19 mixture as specified and heated to 42°C for 2 min. To this mixture Superscript II  
20 RNase H- reverse transcriptase was added and the reverse transcription was  
21 performed as specified. Following reverse transcription 0.1 U/µl Rnase H  
22 (Invitrogen, Carlsbad, CA) was added and the reaction mixture was incubated at  
23 37°C for 20 min. The reaction mixture was then purified using the Wizard<sup>®</sup> SV

1 Gel and PCR Clean-Up System (Promega, Madison, WI) and eluted in 32  $\mu$ l of  
2 nuclease free water. This cDNA was ligated to 100 pmols of WNp213 (a primer  
3 that has an inverted T on its 3' end to prevent self-ligation) using T4 RNA ligase  
4 (Ambion, Austin, TX) in a 100  $\mu$ l reaction. Ligations were performed in 25%  
5 polyethylene glycol 8000, 1 mM hexaammine cobalt (III) chloride, 0.1 mg/ml BSA  
6 and T4 RNA ligase buffer at 22°C for 16 hrs (a brown precipitate forms). This  
7 reaction was purified using the Wizard<sup>®</sup> SV Gel and PCR Clean-Up System  
8 (Promega, Madison, WI) and eluted in 20  $\mu$ l nuclease free water. This eluate was  
9 used for PCR amplification using a nested gene specific primer, primer WNp210  
10 and Taq DNA polymerase (New England Biolabs, Ipswich, MA). The resulting  
11 bands were separated on a 2% agarose gel and the desired bands were gel-  
12 eluted using the Wizard<sup>®</sup> SV Gel and PCR Clean-Up System (Promega,  
13 Madison, WI). The products were then cloned into pCR2.1-TOPO using the  
14 TOPO-TA cloning kit as per the manufacturer's guidelines (Invitrogen, Carlsbad,  
15 CA). The PCR products were sequenced at the Biopolymers Laboratory in the  
16 Massachusetts Institute of Technology Center for Cancer Research.

17 **Measurement of  $\beta$ -galactosidase activity.** For photoheterotrophic growth  
18 cultures were grown on YP medium and inoculated into FW medium at a  $10^{-2}$   
19 dilution supplemented with appropriate electron donors. For photoautotrophic  
20 growth on H<sub>2</sub>, cultures were grown on YP medium and inoculated into FW  
21 medium at a  $10^{-2}$  dilution with H<sub>2</sub>/CO<sub>2</sub>. For photoferrotrophic growth cultures were  
22 grown on FW medium at  $10^{-2}$  dilution with H<sub>2</sub>/CO<sub>2</sub> and inoculated into FW  
23 medium with Fe(II)/Fe(II)-NTA; at least two passages were performed on

1 Fe(II)/Fe(II)-NTA before  $\beta$ -galactosidase activity was determined. A 10 ml culture  
2 in the logarithmic phase of growth ( $OD_{660}$  0.2 for aerobic cultures grown on YP  
3 alone or supplemented with 1 mM succinate, acetate, benzoate, 4-  
4 hydroxybenzoate; for photoheterotrophic growth in FW medium supplemented  
5 with 1 mM succinate, acetate, benzoate, 4-hydroxybenzoate cells were  
6 harvested at  $OD_{660}$  0.2; for photoautotrophic growth on  $H_2$  cells were harvested  
7 at  $OD_{660}$  0.2; for photoautotrophic growth on Fe(II)-NTA cells were harvested  
8  $OD_{660}$  0.1; for photoautotrophic growth on Fe(II) cells were harvested when half  
9 of the added Fe(II) was oxidized) were harvested and resuspended in 200  $\mu$ l of  
10 Z-buffer (0.06 M  $Na_2HPO_4 \cdot 2H_2O$ , 0.04 M  $NaH_2PO_4$ , 0.01 M KCl, 0.001 M  $MgSO_4$ ,  
11 0.05 M  $\beta$ -mercaptoethanol, pH 7.0) and the cells were permeabilized by adding  
12 20  $\mu$ l chloroform and 10  $\mu$ l 0.1% SDS and incubated at room-temperature for 5  
13 min. The cells were then stored on ice and sonicated using a Fisher Scientific  
14 Model 550 Sonic Dismembrator for a total of 2 min at the amplitude of 3 (3 s  
15 pulses followed by 6 s rest). The extracts were then spun at 14,000 rpm in a  
16 microcentrifuge at 4°C for 10 min. 20 -100  $\mu$ l of cell extract was mixed with the Z-  
17 buffer to achieve 900  $\mu$ l volume. The reaction was started by adding 100  $\mu$ l of a 4  
18 mg/ml solution of *o*-nitrophenylgalactopyranoside dissolved in phosphate buffer  
19 (0.06 M  $Na_2HPO_4 \cdot 2H_2O$  and 0.04 M  $NaH_2PO_4$ ). The rate of increase in the  $A_{420}$   
20 due to *o*-nitrophenol formation was measured spectrophotometrically using a  
21 Beckman Coulter DU 800 Spectrophotometer. Activity was calculated with a  
22 molar extinction coefficient ( $\epsilon$ ) of 4500 liters.mol<sup>-1</sup>.cm<sup>-1</sup> for *o*-nitrophenol at 420  
23 nm. Protein estimation was routinely performed using the microtiter plate method



1 for the Biorad Protein Assay reagent (Biorad, Hercules, CA) using BSA as  
2 standard (Thermo Scientific, Waltham, MA). Absorbance at 595 nm was  
3 measured using the Biotek Synergy 4 microtiter plate reader. Reported values for  
4  $\beta$ -galactosidase activity represent mean and standard error of 9 independent  
5 measurements.

6 **Quantitative reverse-transcription PCR.** 5-10 ml of appropriately grown  
7 cultures were added to 2 volumes of RNAprotect Bacteria Reagent (Qiagen,  
8 Valencia, CA), incubated for 5 min at room temperature, and centrifuged for 20  
9 min at 5000 X *g*. RNA was isolated from the cell pellet using the RNeasy Mini Kit  
10 (Qiagen, Valencia, CA) with proteinase K and lysozyme treatment as specified by  
11 the manufacturer. RNA samples were treated with TURBO DNA-free DNase  
12 (Ambion, Austin, TX) to remove genomic DNA contamination. All RNA samples  
13 were stored at -80°C till further use. 400 ng of RNA was used in a 100  $\mu$ l cDNA  
14 synthesis reaction using the iScript cDNA Synthesis Kit (Biorad, Hercules, CA).  
15 The cDNA (1  $\mu$ l) was used as template for quantitative reverse-transcription-PCR  
16 (qRT-PCR) using the iTaq SYBR Green Supermix with Rox (Biorad, Hercules,  
17 CA) on the 7500 Fast Real-Time PCR System (Applied Biosystems, Foster City,  
18 CA). Primer Express v2.0 (Applied Biosystems, Foster City, CA) was used to  
19 design primers targeting the transcripts to be tested (Table S5). The final  
20 concentration of primers used was 200 nM in a reaction volume of 20  $\mu$ l. The  
21 cycling parameters used were 95°C for 3 min, followed by 40 cycles of 95°C for  
22 15 s and 60°C for 30 s. A final dissociation curve was performed for each  
23 reaction to ensure that a single product was amplified each time. The *clpX* and

1 *recA* genes of *R. palustris* TIE-1 were used as an internal controls for  
2 normalization (Dietrich *et al.*, 2006). The  $\Delta\Delta\text{Ct}$  method was used for calculating  
3 mRNA abundance.  $\Delta\text{Ct}$  values for each sample were calculated by subtracting  
4 the Ct value of the *clpX* gene from the Ct value of the target gene. The  $\Delta\Delta\text{Ct}$   
5 value was calculated by subtracting the  $\Delta\text{Ct}$  value of a calibrator condition from  
6 the  $\Delta\text{Ct}$  value of the test sample. The fold difference was then calculated using  
7 the formula  $2^{-\Delta\Delta\text{Ct}}$  according to the Guide to Performing Relative Quantitation of  
8 Gene Expression using Real-Time Quantitative PCR (Applied Biosystems, Foster  
9 City, CA). All samples were assayed as three biological replicates measured in  
10 triplicate and the cycle time determined automatically by the Real Time 7500  
11 PCR software (Applied Biosystems, Foster City, CA).

12 **Overexpression and purification of FixK from *E. coli*.** The cell pellets of 500  
13 ml cultures carrying overexpressed His<sub>6</sub>-FixK protein was resuspended in 5 ml  
14 ice-cold 50 mM 4-(2-hydroxyethyl)-1-piperazineethanesulfonic acid (HEPES) (pH  
15 7.0) buffer containing 0.5 M NaCl (1X Native binding buffer) with 1X Complete,  
16 EDTA-free, Protease Inhibitor Cocktail (Roche, Indianapolis, IN). Cells were  
17 broken 2X in a French pressure cell (20,000 psi) and centrifuged at 13,000 X *g*  
18 for 30 min to pellet cell debris and the resultant supernatant was passed over a  
19 Ni-NTA agarose (5 ml bed volume) (Qiagen, Valencia, CA) gravity flow column  
20 pre-equilibrated with 10 bed volumes of 1X Native binding buffer. Contaminating  
21 *E. coli* proteins were washed off the column in a stepwise fashion with buffers  
22 identical to 1X Native binding buffer, but with varying concentrations of imidazole  
23 (20, 50, and 100 mM; 10 bed volumes of each of the buffers was used for

1 washes). His<sub>6</sub>-FixK protein was collected from the column after washing with 2.5  
2 ml of buffer containing 500 mM imidazole. His<sub>6</sub>-FixK after affinity chromatography  
3 was purified to apparent homogeneity, as ascertained by SDS-PAGE followed by  
4 Coomassie Brilliant Blue staining (Figure S5). High-purity His<sub>6</sub>-FixK was desalted  
5 using disposable PD-10 Desalting columns with a 10 kDa molecular weight cut-  
6 off as per the manufacturer's guidelines (GE Healthcare, Piscataway, NJ) and  
7 the original buffer was exchanged with 50 mM HEPES (pH 7.0), 250 mM KCl,  
8 containing 50% glycerol, 1 mM dithiothreitol (DTT) and 0.1 mM  
9 ethylenediaminetetraacetic acid (EDTA).

10 **Electrophoretic mobility shift assay (EMSA).** DNA probes were designed as  
11 indicated in the *Experimental procedures*. The labeling efficiency of the probes  
12 was then determined as specified and 20 µl gel shift reactions were set up with  
13 30 fmol of DIG labeled probe, desired amount of protein, 1 µg of poly [d(I-C)], 1  
14 µg of poly L-lysine in binding buffer [20 mM HEPES, pH 7.6, 1 mM EDTA, 10 mM  
15 (NH<sub>4</sub>)<sub>2</sub>SO<sub>4</sub>, 1 mM DTT, Tween 20 0.2% (w/v), 30 mM KCl]. The reactions were  
16 incubated at room temperature for 15 min and loaded immediately on a pre-run  
17 8% 0.5 X Tris-Borate-EDTA (TBE) polyacrylamide gel run at 80 V at room  
18 temperature till the bromophenol blue dye reached ¾ of the gel. The gels were  
19 then electro-blotted onto positively charged nylon membranes (Roche,  
20 Indianapolis, IN) using a Biorad Mini Trans-Blot Electrophoretic Transfer Cell at  
21 400 A for 30 min in 0.5 X TBE. Following electro-transfer the DNA probes were  
22 detected by immunoassay as specified by the manufacturer followed by  
23 chemiluminescence using Amersham Hyperfilm ECL films (GE Healthcare,

1 Piscataway, NJ). The exposed films were developed and fixed using a Kodak  
2 (CareStream) M35A X-Omat film processor.

3

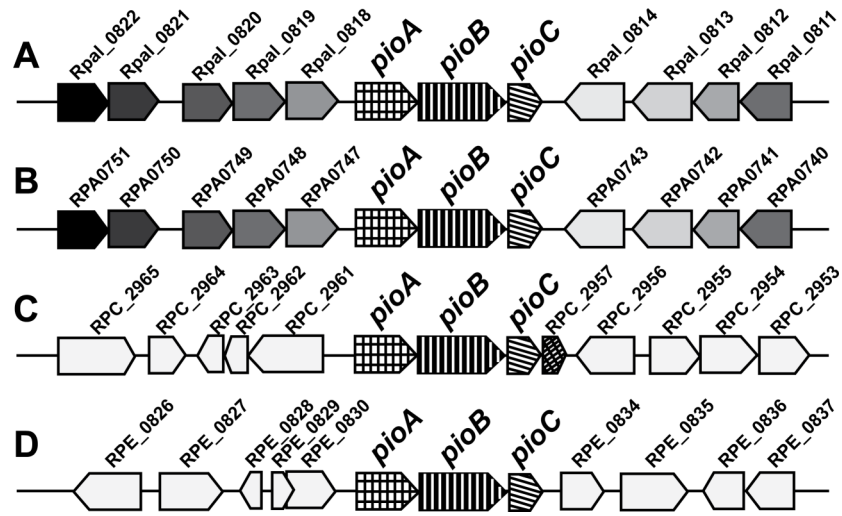

1

2 **Figure S1. *pioABC* genetic locus organization in A: *R. palustris* TIE-1; B: *R.***  
 3 ***palustris* CGA009; C: *R. palustris* BisB18 and D: *R. palustris* BisA53.** The genes  
 4 depicted in grey are conserved in location in *R. palustris* TIE-1 and CGA009. The  
 5 genes depicted in white are not conserved in location. The other genes are  
 6 conserved in location and are color coded according to location.

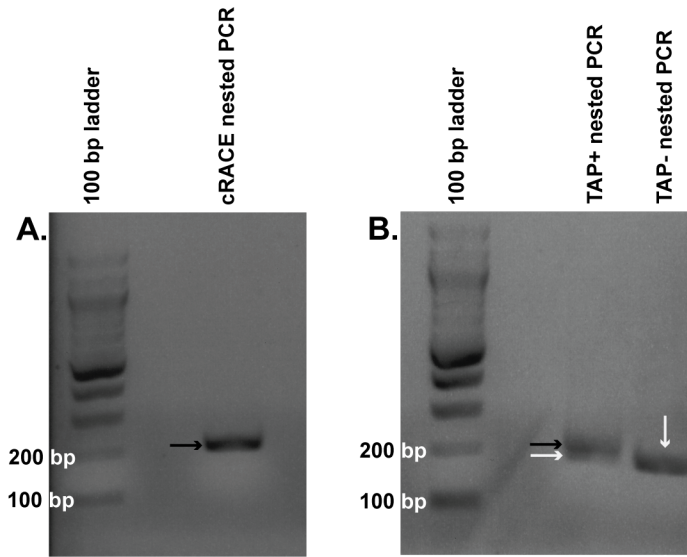

1

2 **Figure S2. Nested PCR results for cRACE and 5'RLAM-RACE. Panel A.** A

3 representative 2% agarose gel with a 100 bp DNA marker and the 213 bp nested

4 PCR product using primers PpioTIE-1rev and WNp210 (black arrow). **Panel B.** A

5 representative 2% agarose gel with a 100 bp DNA marker and the 234 bp Tap+

6 (black arrow) and 209 bp TAP- (white arrow) nested PCR product using primers

7 PpioTIE-1rev and 5'RACE outer primer. The 209 bp processed product can be

8 seen as the lower band in the TAP+ lane. The relevant bands of the marker are

9 shown. These experiments were performed using RNA isolated from

10 photoferrotrophically grown cultures. Larger reactions of these PCRs were

11 separated, gel eluted and cloned into pCR<sup>®</sup>2.1-TOPO<sup>®</sup> using the TOPO-TA

12 cloning kit as per the manufacturer's guidelines (Invitrogen, Carlsbad, CA). The

13 PCR products were sequenced at the Biopolymers Laboratory in the

14 Massachusetts Institute of Technology Center for Cancer Research.

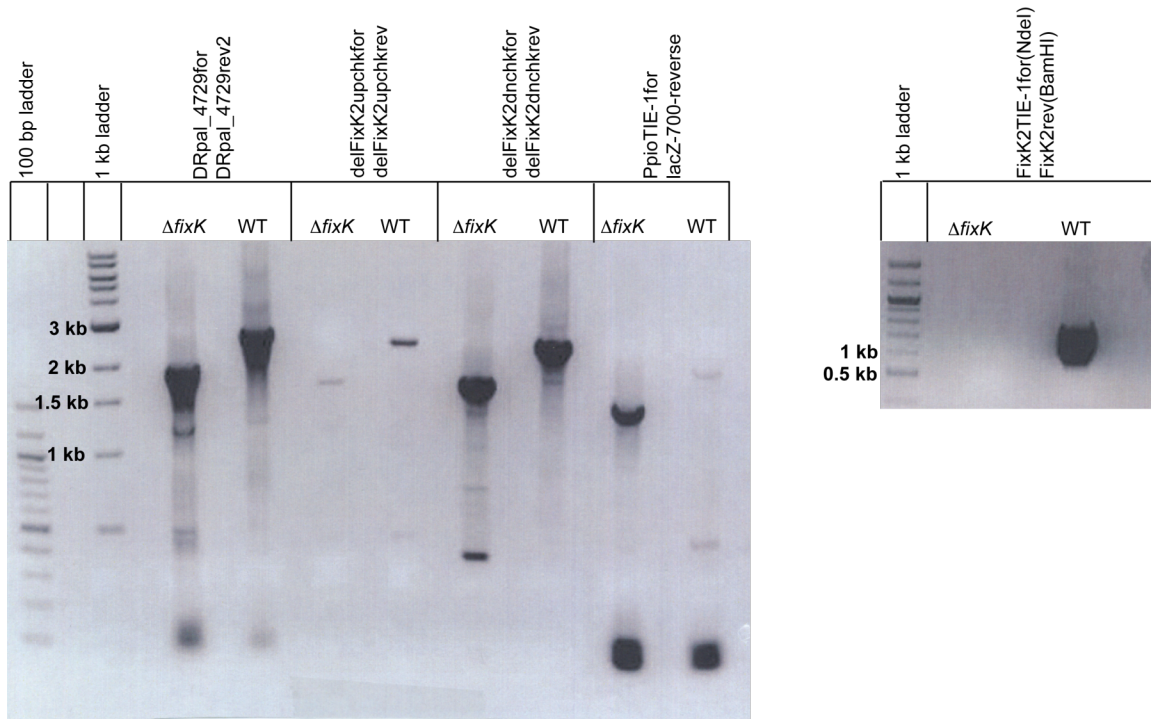

1

2 **Figure S3. PCR to confirm the  $\Delta fixK$  mutant of *R. palustris* TIE-1.** Five  
3 independent PCR reactions were performed. The first PCR was used to confirm  
4 that the upstream and downstream regions of *fixK* cloned in to pJQ200KS was  
5 on the chromosome of the deletion strain. In the  $\Delta fixK$  strain the product is be  
6 1963 bp; the WT band is 2644 bp. The second PCR was to confirm the  
7 upstream locus of  $\Delta fixK$ ; mutant product is 1581 bp; WT product is 2271 bp. The  
8 third PCR was to confirm the downstream locus of  $\Delta fixK$ : mutant product 1664 is  
9 bp; WT product is 2354 bp. The fourth PCR was to confirm that the strain had a  
10 *lacZ* gene; the mutant gives product 1102 bp long while WT does not yield any  
11 product. The fifth PCR was to confirm that  $\Delta fixK$  did not yield a product for *fixK*;  
12 mutant does not give a product while WT gives a 702 bp product. Relevant  
13 bands in the DNA markers are indicated.

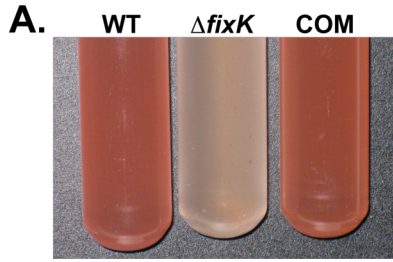

**B.** Fold-change in mRNA abundance during anaerobic growth on Fe vs. aerobic growth on succinate in WT,  $\Delta fixK$  and complemented strains.

| Strain                                                  | <i>pioA</i>  | <i>pioB</i> | <i>pioC</i> | <i>fixK</i> |
|---------------------------------------------------------|--------------|-------------|-------------|-------------|
| WT                                                      | 1186.2±244.4 | 215.2±26.2  | 426.0±28.7  | 12.2±2.4    |
| $\Delta fixK$                                           | 11.4±2.4     | 5.8±1.0     | 2.2±0.2     | ND          |
| $\Delta fixK$ <i>fixK</i> -pSRKGm                       | 79.8±9.9     | 34.4±1.5    | 4.6±0.6     | 7.2±0.6     |
| $\Delta fixK$ NtermHis <sub>6</sub> <i>fixK</i> -pSRKGm | 30.8±3.8     | 19.5±0.9    | 6.8±0.9     | 11.8±1.1    |

1

2 **Figure S4. Complementation of  $\Delta fixK$  using WT gene and NtermHis<sub>6</sub>-tagged**

3 **gene. A.** WT *R. palustris* TIE-1 growing on FW succinate produces ample

4 pigmentation under photoheterotrophic conditions while  $\Delta fixK$  does not.  $\Delta fixK$

5 complemented with native *fixK* had WT levels of pigmentation. **B.** qRT-PCR

6 analysis comparing expression of *pioABC* and *fixK* in WT is compared to  $\Delta fixK$

7 and strains complemented with the native *fixK* gene or the NtermHis<sub>6</sub>-tagged

8 version resulted in partial restoration of *pioABC* expression and full restoration of

9 *fixK* expression.



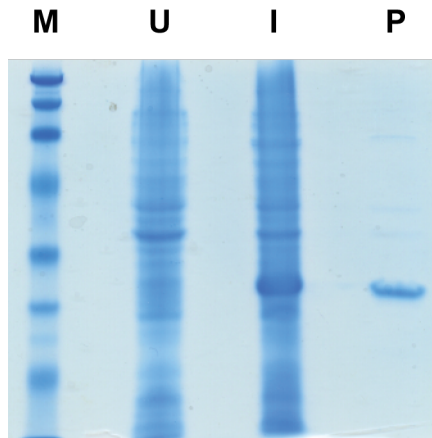

1

2 **Figure S5. Purified His<sub>6</sub>-FixK from *E. coli*.** M – Broad range marker (Biorad,  
3 Hercules, CA). U – uninduced *E. coli* extract. I – induced *E. coli* extract. P –  
4 purified protein (27.6 kDa).

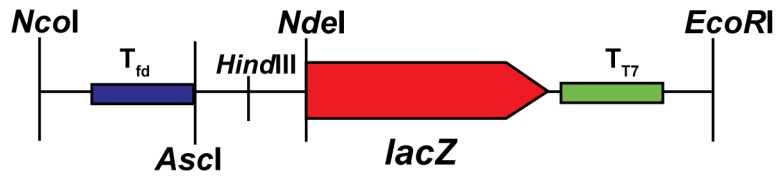

1

2 **Figure S6. *lacZ* cassette made for use as translational fusion.** The *lacZ* gene  
3 was flanked by fd terminator in front and T7 terminator at the end of the gene. An  
4 *Ascl* and *NdeI* site were engineered in the beginning of the *lacZ* gene to clone in  
5 any promoter region of interest in frame with the ATG start codon of *lacZ*.

1 **References**

- 2 Barthelmebs, L., B. Lecomte, C. Divies & J. F. Cavin, (2000) Inducible  
3 metabolism of phenolic acids in *Pediococcus pentosaceus* is encoded by  
4 an autoregulated operon which involves a new class of negative  
5 transcriptional regulator. *J Bacteriol* **182**: 6724-6731.
- 6 Casadaban, M. J. & S. N. Cohen, (1980) Analysis of gene control signals by DNA  
7 fusion and cloning in *Escherichia coli*. *J Mol Biol* **138**: 179-207.
- 8 Choi, K. H. & H. P. Schweizer, (2006) mini-Tn7 insertion in bacteria with single  
9 attTn7 sites: example *Pseudomonas aeruginosa*. *Nat Protoc* **1**: 153-161.
- 10 de Lorenzo, V., I. Cases, M. Herrero & K. N. Timmis, (1993) Early and late  
11 responses of TOL promoters to pathway inducers: identification of  
12 postexponential promoters in *Pseudomonas putida* with lacZ-tet bicistronic  
13 reporters. *J Bacteriol* **175**: 6902-6907.
- 14 Dietrich, L. E. P., A. Price-Whelan, A. Petersen, M. Whiteley & D. K. Newman,  
15 (2006) The phenazine pyocyanin is a terminal signalling factor in the  
16 quorum sensing network of *Pseudomonas aeruginosa*. *Mol Microbiol* **61**:  
17 1308-1321.
- 18 Dispensa, M., C. T. Thomas, M. K. Kim, J. A. Perrotta, J. Gibson & C. S.  
19 Harwood, (1992) Anaerobic growth of *Rhodopseudomonas palustris* on 4-  
20 hydroxybenzoate is dependent on AadR, a member of the cyclic AMP  
21 receptor protein family of transcriptional regulators. *J Bacteriol* **174**: 5803-  
22 5813.

- 1 Evans, K., T. Georgiou, T. Hillon, A. Fordham-Skelton & M. Papiz, (2008)  
2 Bacteriophytochromes control photosynthesis in *Rhodopseudomonas*  
3 *palustris*. In: The Purple Phototrophic Bacteria. pp. 799-809.
- 4 Gury, J., L. Barthelmebs, N. P. Tran, C. Divies & J. F. Cavin, (2004) Cloning,  
5 deletion, and characterization of PadR, the transcriptional repressor of the  
6 phenolic acid decarboxylase-encoding *padA* gene of *Lactobacillus*  
7 *plantarum*. *Appl Environ Microbiol* **70**: 2146-2153.
- 8 Jiao, Y. & D. K. Newman, (2007) The *pio* operon is essential for phototrophic  
9 Fe(II) oxidation in *Rhodopseudomonas palustris* TIE-1. *J Bacteriol* **189**:  
10 1765-1773.
- 11 Jiao, Y. Y. Q., A. Kappler, L. R. Croal & D. K. Newman, (2005) Isolation and  
12 characterization of a genetically tractable photoautotrophic Fe(II)-oxidizing  
13 bacterium, *Rhodopseudomonas palustris* strain TIE-1. *Appl Environ*  
14 *Microbiol* **71**: 4487-4496.
- 15 Khan, S. R., J. Gaines, R. M. Roop & S. K. Farrand, (2008) Broad-host-range  
16 expression vectors with tightly regulated promoters and their use to  
17 examine the influence of TraR and TraM expression on Ti plasmid quorum  
18 sensing. *Appl Environ Microbiol* **74**: 5053-5062.
- 19 Koch, B., L. E. Jensen & O. Nybroe, (2001) A panel of Tn7-based vectors for  
20 insertion of the *gfp* marker gene or for delivery of cloned DNA into Gram-  
21 negative bacteria at a neutral chromosomal site. *J Microbiol Methods* **45**:  
22 187-195.

1 Kovach, M. E., P. H. Elzer, D. S. Hill, G. T. Robertson, M. A. Farris, R. M. Roop,  
2 2nd & K. M. Peterson, (1995) Four new derivatives of the broad-host-  
3 range cloning vector pBBR1MCS, carrying different antibiotic-resistance  
4 cassettes. *Gene* **166**: 175-176.

5 Lang, S. E., F. E. Jenney, Jr. & F. Daldal, (1996) *Rhodobacter capsulatus* CychH:  
6 a bipartite gene product with pleiotropic effects on the biogenesis of  
7 structurally different c-type cytochromes. *J Bacteriol* **178**: 5279-5290.

8 Lou, H., K. Beis, J. H. Naismith & D. Larry, (2009) Bacterial membrane proteins:  
9 the new soluble proteins? In: Current Topics in Membranes. Academic  
10 Press, pp. 269-297.

11 Pan, C., Y. Oda, P. K. Lankford, B. Zhang, N. F. Samatova, D. A. Pelletier, C. S.  
12 Harwood & R. L. Hettich, (2008) Characterization of anaerobic catabolism  
13 of p-coumarate in *Rhodopseudomonas palustris* by integrating  
14 transcriptomics and quantitative proteomics. *Mol Cell Proteomics* **7**: 938-  
15 948.

16 Pitcher, R. S., T. Brittain & N. J. Watmough, (2002) Cytochrome cbb(3) oxidase  
17 and bacterial microaerobic metabolism. *Biochem Soc Trans* **30**: 653-658.

18 Preisig, O., R. Zufferey & H. Hennecke, (1996) The *Bradyrhizobium japonicum*  
19 *fixGHIS* genes are required for the formation of the high-affinity cbb3-type  
20 cytochrome oxidase. *Arch Microbiol* **165**: 297-305.

21 Quandt, J. & M. F. Hynes, (1993) Versatile suicide vectors which allow direct  
22 selection for gene replacement in gram-negative bacteria. *Gene* **127**: 15-  
23 21.

1 Sitthisak, S., L. Knutsson, J. W. Webb & R. K. Jayaswal, (2007) Molecular  
2 characterization of the copper transport system in *Staphylococcus aureus*.  
3 *Microbiology* **153**: 4274-4283.

4 Willows, R. D. & A. M. Kriegel, (2008) Biosynthesis of bacteriochlorophylls in  
5 purple bacteria. In: *The Purple Phototrophic Bacteria*. pp. 57-79.

6 Yim, H. H. & M. Villarejo, (1992) *osmY*, a new hyperosmotically inducible gene,  
7 encodes a periplasmic protein in *Escherichia coli*. *J Bacteriol* **174**: 3637-  
8 3644.

9

10

11
